# Supplementary material for: Single-cell analysis of AIMP2 splice variants informs on drug sensitivity and prognosis in hematologic cancer
Source: PubMed Central journal article supplement (PMC7599330; doi:10.1038/s42003-020-01353-x), 2020-10-30
Supplement: 42003_2020_1353_MOESM1_ESM.pdf [file 42003_2020_1353_MOESM1_ESM.pdf]

# 1 Supplementary figures

## Supplementary Figure 1

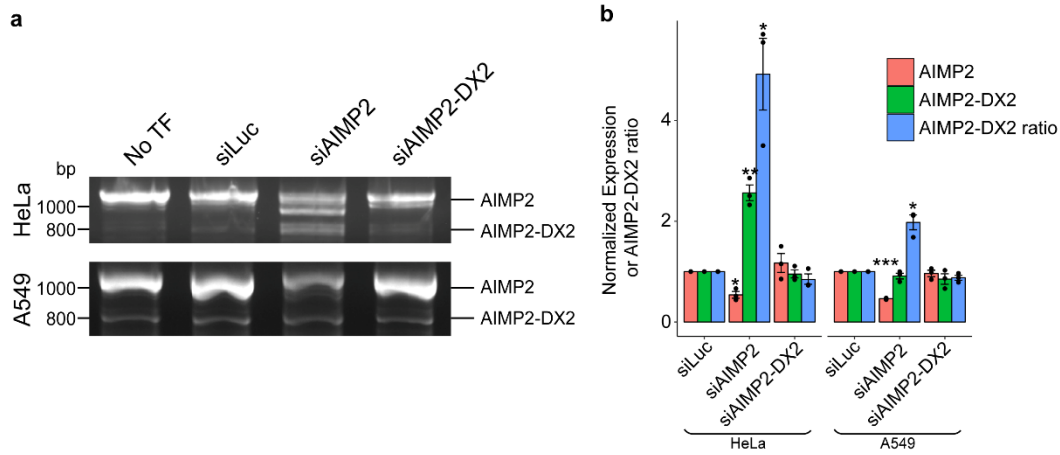

2

3 **Supplementary Fig. 1. RNA-smFISH method validation.** **a** PCR-amplified bands for AIMP2  
4 and AIMP2-DX2 mRNA from HeLa (top) or A549 (bottom) cells. The lower band indicates  
5 AIMP2-DX2. **b** Quantified PCR band intensities in the siRNA transfected cells. Quantitation was  
6 normalized to that of the siLuc transfected cells. The average of three biological replicates are  
7 plotted with error bars indicate s.e.m. (\*)  $P < 0.05$ , (\*\*)  $P < 0.01$ , (\*\*\*)  $P < 0.001$ . For statistical  
8 analysis, a one-tailed  $t$ -test with unequal variance was used.



22 carcinoma; GC, gastric adenocarcinoma; CESC, cervical squamous cell carcinoma and  
23 endocervical adenocarcinoma; SARC, sarcoma; OV, ovarian serous cystadenocarcinoma; BC,  
24 breast invasive carcinoma; COAD, colon adenocarcinoma; READ, rectum adenocarcinoma; RCC,  
25 kidney renal clear cell carcinoma; PRAD, prostate adenocarcinoma; HNSC, head and neck  
26 squamous cell carcinoma; UCEC, uterine corpus endometrial carcinoma;

**a. Colon adenocarcinoma**

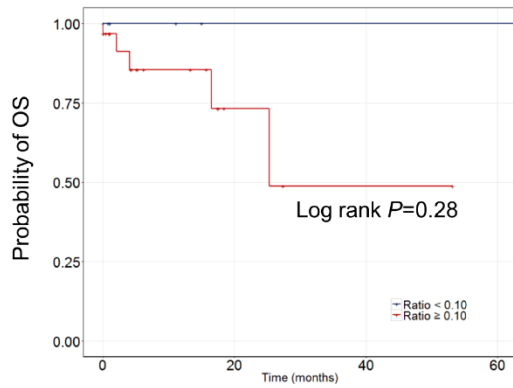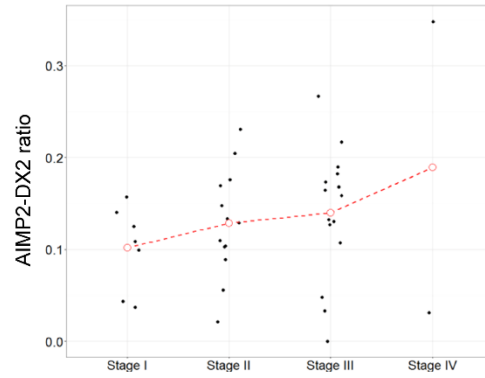

**b. Hepatocellular carcinoma**

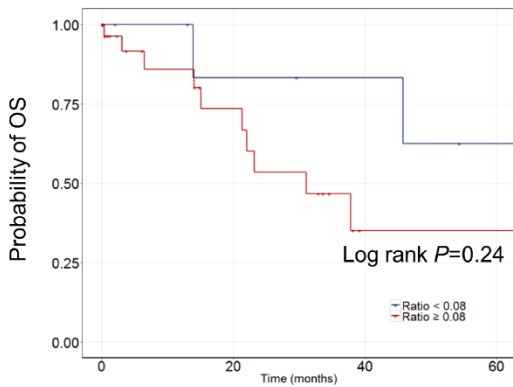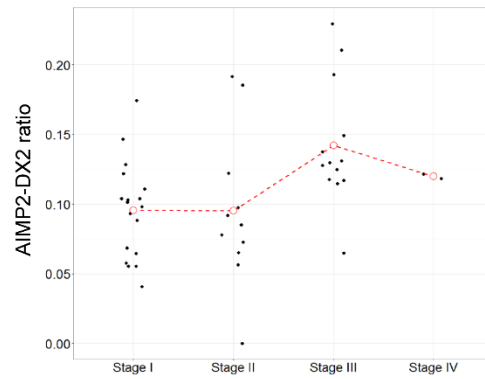

**c. Lung adenocarcinoma**

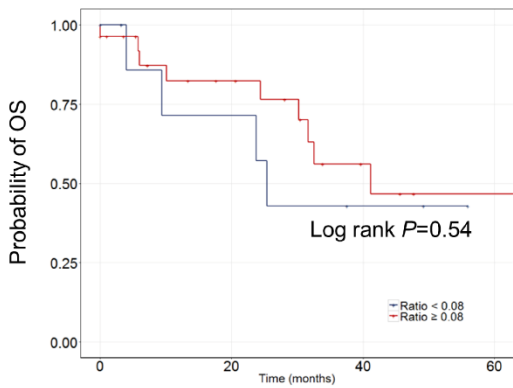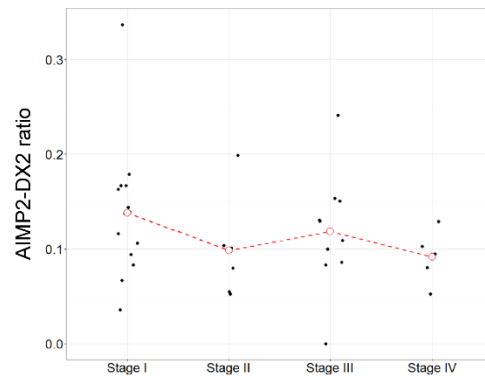

27

28 **Supplementary Fig. 3. The implication of the AIMP2-DX2/AIMP2 ratio for OS and TNM**

29 **stage for three cancer types in the ICGC/TCGA database: a colon carcinoma, b hepatocellular**

30 **carcinoma, and c lung adenocarcinoma. For each cancer type, a Kaplan–Meier curve for OS and a**

31 scatter plot demonstrating the distribution of AIMP2-DX2/AIMP2 expression ratio over the TNM  
32 stage are illustrated. The cutoff value for stratifying two groups in Kaplan–Meier curves was set  
33 to the first quartile value of the AIMP2-DX2/AIMP2 expression ratio. A solid red line indicates  
34 AML samples with an AIMP2-DX2/AIMP2 expression ratio  $\geq$  cutoff, while a solid blue line  
35 corresponds to those with an AIMP2-DX2/AIMP2 expression ratio  $<$  cutoff.

36

37 Abbreviations: OS, Overall survival.

## Supplementary Figure 4

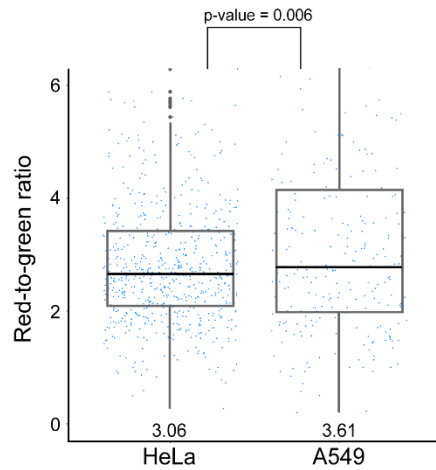

38

39 **Supplementary Fig. 4. The single-cell analysis for adherent cells.** Box plot of the RNA-smFISH  
40 red-to-green signal ratio of the single-cell analysis for the adherent cell lines. Numbers on the  
41 bottom of the box indicate the average ratio.  $n = 653$  for HeLa and  $n = 260$  for A549 cells. Box  
42 plot features: center line, median; box limits, upper and lower quartiles; whiskers, 1.5x  
43 interquartile range; points, individual red-to-green ratio. For statistical analysis, a one-tailed  $t$ -test  
44 with unequal variance was used.

Supplementary Figure 5

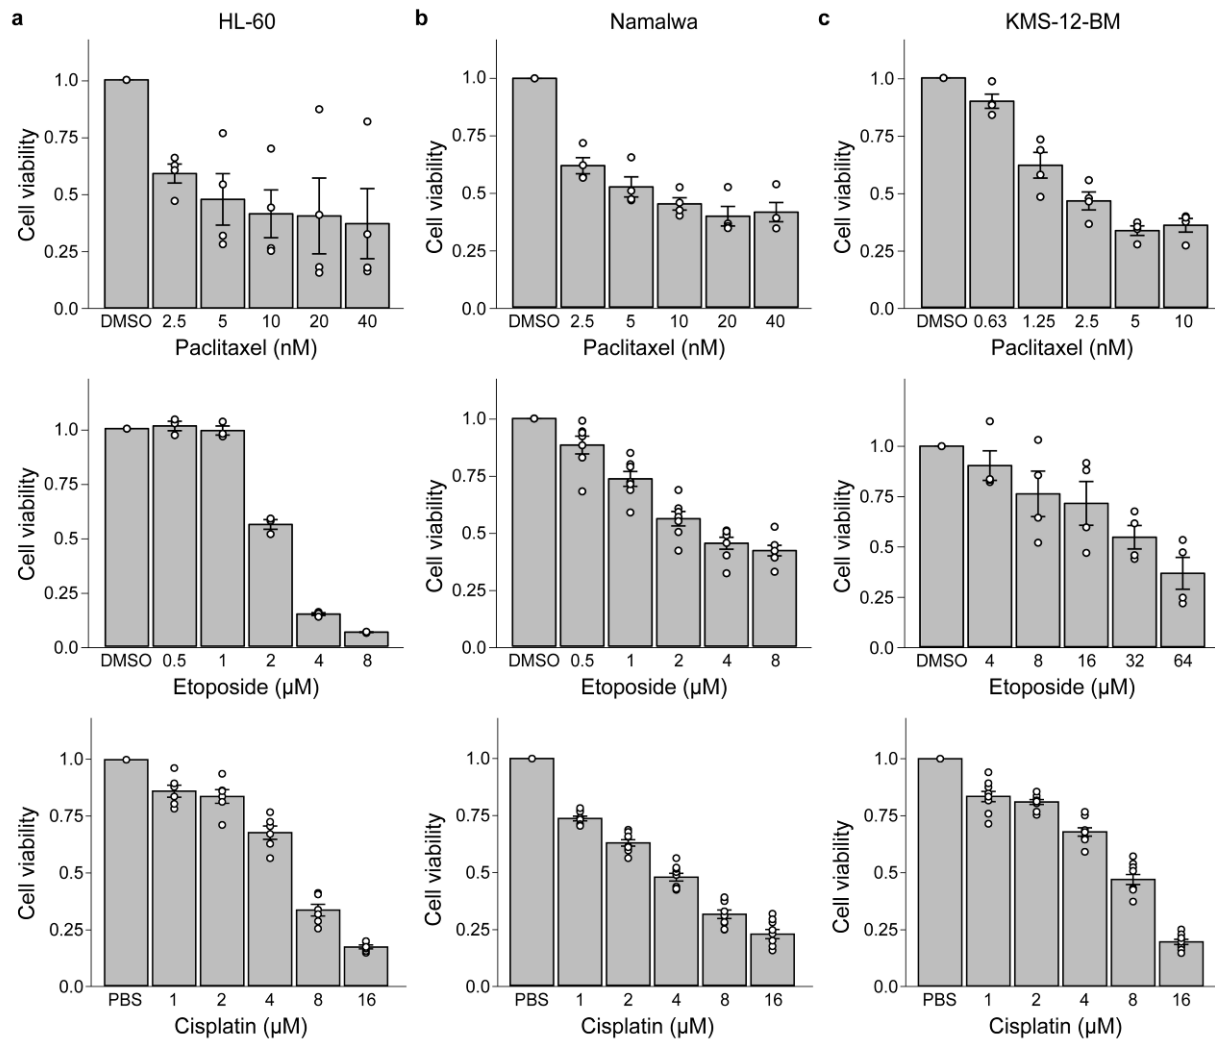

45

46 **Supplementary Fig. 5. The effect of anti-cancer drug treatment on cell viability of**  
 47 **hematologic cancers. a-c** Treatment with paclitaxel, etoposide, or cisplatin results in decreased  
 48 cell viability in HL-60 cells **a**, Namalwa cells **b**, and KMS-12-BM cells **c**.  $n = 4$  for paclitaxel in  
 49 all three cell lines.  $n = 3$  for HL-60,  $n = 7$  for Namalwa,  $n = 4$  for KMS-12-BM for etoposide.  $n =$   
 50  $6$  for HL-60,  $n = 9$  for Namalwa,  $n = 9$  for KMS-12-BM for cisplatin. For all data presented, the  
 51 average is shown with error bars indicate s.e.m.

Supplementary Figure 6

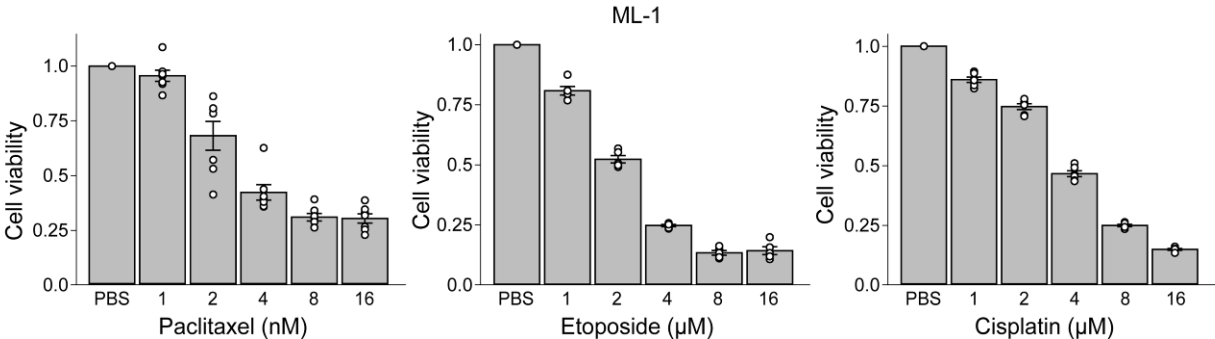

52

53 **Supplementary Fig. 6. The effect of anti-cancer drug treatment on cell viability of ML-1 cells.**

54 Treatment of paclitaxel, etoposide, or cisplatin results in decreased cell viability in ML-1 cells. *n*

55 = 7 for paclitaxel, *n* = 5 for etoposide, *n* = 6 for cisplatin. For all data presented, the average is

56 shown with error bars indicate s.e.m.



Fig. 1c

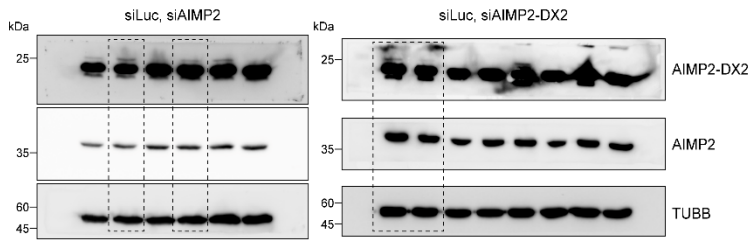

Fig. 5a

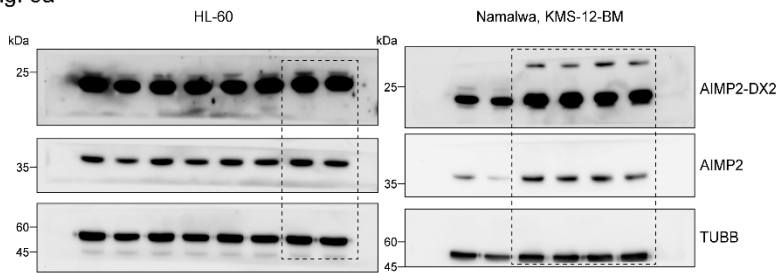

Fig. 6e

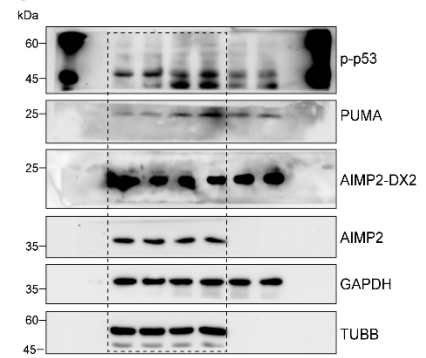

Supplementary Fig. 1a

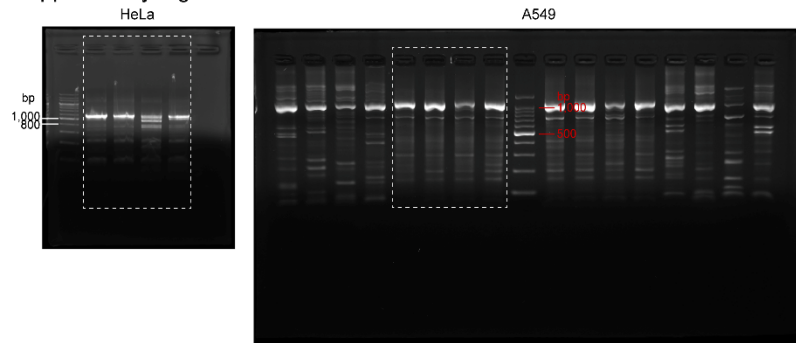

57

58 **Supplementary Fig. 7. Uncropped blot/gel images from main and supplementary figures.**

59 **Supplementary Table 1. Clinical characteristics of 753 samples from the ICGC/TCGA**  
60 **database.** Only samples with whole transcriptome data were included in this study.

| Characteristics                       | Value      |
|---------------------------------------|------------|
| Age, mean (range)                     | 59 (17-90) |
| Gender, n (%)                         |            |
| Male                                  | 347 (46.1) |
| Female                                | 406 (53.9) |
| Disease, n (%)                        |            |
| Bladder urothelial carcinoma          | 22 (2.9)   |
| Acute myeloid leukemia                | 19 (2.5)   |
| Glioblastoma multiforme               | 29 (3.9)   |
| Lung adenocarcinoma                   | 37 (4.9)   |
| Ovarian serous cystadenocarcinoma     | 20 (2.7)   |
| Lung squamous cell carcinoma          | 41 (5.4)   |
| Liver hepatocellular carcinoma        | 49 (6.5)   |
| Breast invasive carcinoma             | 84 (11.2)  |
| Thyroid carcinoma                     | 44 (5.8)   |
| Stomach adenocarcinoma                | 25 (3.3)   |
| Colon adenocarcinoma                  | 43 (5.7)   |
| Skin cutaneous melanoma               | 37 (4.9)   |
| Rectum adenocarcinoma                 | 14 (1.9)   |
| Kidney renal clear cell carcinoma     | 37 (4.9)   |
| Prostate adenocarcinoma               | 18 (2.4)   |
| Cervical squamous cell carcinoma      | 18 (2.4)   |
| Diffuse large B-cell lymphoma         | 6 (0.8)    |
| Head and neck squamous cell carcinoma | 40 (5.3)   |
| Kidney chromophobe                    | 46 (6.1)   |
| Kidney renal papillary cell carcinoma | 29 (3.9)   |
| Brain lower grade glioma              | 17 (2.3)   |
| Sarcoma                               | 33 (4.4)   |
| Uterine corpus endometrial carcinoma  | 45 (6.0)   |

61 Abbreviations: ICGC, the International Cancer Consortium; TCGA, The Cancer Genome Atlas.

62 **Supplementary Table 2. Targeted RNA-sequencing of 16 cancer cell lines and the results of**

63 **RNA-smFISH analysis**

| Cell line | AIMP2<br>(read count) | AIMP2-DX2<br>(read count) | AIMP2-DX2<br>expression ratio | smFISH<br>(red-to-green<br>ratio) |
|-----------|-----------------------|---------------------------|-------------------------------|-----------------------------------|
| HL-60     | 6424                  | 679                       | 10.57%                        | 6.64                              |
| ML-1      | 6263                  | 525                       | 8.38%                         | 8.43                              |
| SK-LU-1   | 10316                 | 745                       | 7.22%                         |                                   |
| 536MM     | 8291                  | 594                       | 7.16%                         | 5.03                              |
| CEM       | 12899                 | 786                       | 6.09%                         |                                   |
| NCI-H460  | 21081                 | 1260                      | 5.98%                         |                                   |
| HS-Sultan | 7239                  | 371                       | 5.13%                         | 2.12                              |
| NCI-H358  | 25930                 | 1167                      | 4.50%                         |                                   |
| SK-MES-1  | 41052                 | 1593                      | 3.88%                         |                                   |
| A549      | 35737                 | 1201                      | 3.36%                         | 3.20                              |
| NCI-H1299 | 33675                 | 1056                      | 3.14%                         |                                   |
| KMS-12-BM | 3337                  | 90                        | 2.70%                         | 1.81                              |
| EJM       | 6885                  | 161                       | 2.34%                         | 1.21                              |
| Calu-3    | 59773                 | 1173                      | 1.96%                         |                                   |
| HCC-1588  | 29954                 | 586                       | 1.96%                         |                                   |
| Namalwa   | 4957                  | 69                        | 1.39%                         | 1.39                              |

64 Abbreviations: smFISH, single-molecule fluorescence ISH.

65 **Supplementary Table 3. Primer sequences for RT-PCR and qPCR.**

**RT-PCR primer sequences**

| Gene              | Forward (5' – 3')                                    | Reverse (5' – 3')                                          |
|-------------------|------------------------------------------------------|------------------------------------------------------------|
| Full-length AIMP2 | TGG CCA CGT GCA GGA AG                               | CTG AAG TGC TCA CAG AGG GTC                                |
| AIMP2-DX2 AIMP2   | TGG CCA CGT GCA GGA TT<br>GTC GTG ACC TCT GAC GGT TT | CTG AAG TGC TCA CAG AGG GTC<br>TGA CAC TTG ACA ACT GGC CTA |

66

**qPCR primer sequences**

| Gene               | Forward (5' – 3')                                                                                 | Reverse (5' – 3')                                                                               |
|--------------------|---------------------------------------------------------------------------------------------------|-------------------------------------------------------------------------------------------------|
| AIMP2              | GCC GAT GTA CCA GGT AAA GC                                                                        | ATC ATC TTG GCG GGA CTC AA                                                                      |
| PUMA               | CGA CCT CAA CGC ACA GTA CGA                                                                       | AGG CAC CTA ATT GGG CTC CAT                                                                     |
| BAX                | TGG AGC TGC AGA GGA TGA TTG                                                                       | GAA GTT GCC GTC AGA AAA CAT<br>G                                                                |
| p21                | AGG TGG ACC TGG AGA CTC TCA<br>G                                                                  | TCC TCT TGG AGA AGA TCA GCC<br>G                                                                |
| p53                | ACC TAT GGA AAC TAC TTC CTG<br>AAA                                                                | CTG GCA TTC TGG GAG CTT CA                                                                      |
| p38<br>JNK<br>ERK1 | CCC CGC TTA TCT CAT TAA CAG G<br>AGG ACT GCA GGA ACG AGT TT<br>CCT GCG ACC TTA AGA TTT GTG<br>ATT | TCT TCT CCA GCA AGT CGA CAG<br>CTC CCA TGA TGC ACC CAA CT<br>CAG GGA AGA TGG GCC GGT<br>TAG AGA |
| ERK2               | GCG CGG GCC CGG AGA TGG TC                                                                        | TGA AGC GCA GTA AGA TTT TT                                                                      |
| ERK5               | CCT CTG TAG CGG CCA AGA AC                                                                        | GGA GGA CAC CAC TCC ATA GG                                                                      |
| MEK1               | CTC TGC AGT TAA CGG GAC CA                                                                        | CTC CCA CCT TCT GCT TCT GG                                                                      |
| MEK2               | TGA ACG AGC CAC CTC CTA AG                                                                        | AGG TGT GGT TTG TGA GCA TCT                                                                     |
| JAK1               | CAT CCC CAT TAC GGT GCT GT                                                                        | CAG ATT TCC CAG AGC GTG GT                                                                      |
| JAK2               | TGG AGG GAA CAT CCA CCT CT                                                                        | TCT GCC TCA GAT TTC CCA AGG                                                                     |
| JAK3               | AGC TCT ATG CCT GCC AAG AC                                                                        | GGC ACC TGT ATT GTC GCC TA                                                                      |
| STAT1              | TGA TGG CCC TAA AGG AAC TGG                                                                       | AGA GCC CAC TAT CCG AGA CA                                                                      |
| STAT2              | CCG GGA CAT TCA GCC CTT TT                                                                        | GTT CCA ATT GGG CCC TCT GA                                                                      |
| STAT3              | GAC ATT CCC AAG GAG GAG GC                                                                        | TAT TGC TGC AGG TCG TTG GT                                                                      |
| STAT4              | ATC GTA CGT TGG TCG TGG TC                                                                        | TTC CTT GCA GAA CTT GGC CC                                                                      |
| STAT5A             | TAT GTG TTT CCT GAC CGC CC                                                                        | ACT CAG GGA CCA CTT GCT TG                                                                      |
| STAT5B             | ACA TTA AGG CCA CCC AGC TC                                                                        | GCC CCA GCT TGA TCT TCA GT                                                                      |
| STAT6              | GGC ATC TTC TGG GTG ACT GG                                                                        | GGT GCT GGA CAG TGT CTG AA                                                                      |
| GAPDH              | CTC CTC CAC CTT TGA CGC TG                                                                        | TCC TCT TGT GCT CTT GCT GG                                                                      |

67

68 **Supplementary Table 4. Information on the 17 cell lines used in this study**

| #  | Cell line | Disease                       | Culture condition                                                                         | Resource | cat. No. |
|----|-----------|-------------------------------|-------------------------------------------------------------------------------------------|----------|----------|
| 1  | HL-60     | Acute myeloid leukemia        | 90% RPMI 1640 + 10% h.i. FBS                                                              | DSMZ     | ACC-3    |
| 2  | CEM       | Acute lymphoblastic leukemia  | 90% RPMI 1640 + 10% h.i. FBS                                                              | DSMZ     | ACC-240  |
| 3  | HS-SULTAN | Burkitt's lymphoma            | 90% RPMI 1640 + 10% h.i. FBS                                                              | ATCC     | CRL-1484 |
| 4  | Namalwa   | Burkitt's lymphoma            | 90% RPMI 1640 + 10% h.i. FBS                                                              | DSMZ     | ACC-240  |
| 5  | SNU-536MM | Multiple myeloma              | 90% RPMI 1640 + 10% h.i. FBS                                                              | SNU      |          |
| 6  | KMS-12-BM | Multiple myeloma              | 80% RPMI 1640 + 20% h.i. FBS                                                              | DSMZ     | ACC-551  |
| 7  | EJM       | Multiple myeloma              | 90% RPMI 1640 + 10% h.i. FBS                                                              | DSMZ     | ACC-560  |
| 8  | SK-LU-1   | Lung adenocarcinoma           | 90% MEM + 10% h.i. FBS                                                                    | ATCC     | HTB-57   |
| 9  | A549      | Lung adenocarcinoma           | 90% Dulbecco's MEM + 10% h.i. FBS                                                         | DSMZ     | ACC-107  |
| 10 | NCI-H460  | Large cell lung cancer        | 90% RPMI 1640 + 10% h.i. FBS                                                              | DSMZ     | ACC-737  |
| 11 | NCI-H358  | Non-small cell lung carcinoma | 90% RPMI 1640 + 10% h.i. FBS                                                              | ATCC     | CRL-5807 |
| 12 | NCI-H1299 | Non-small cell lung carcinoma | 90% RPMI 1640 + 10% h.i. FBS                                                              | ATCC     | CRL-5803 |
| 13 | HCC-1588  | Lung squamous cell carcinoma  | 90% MEM (with Earle's salts) + 10% h.i. FBS + 2 mM L-glutamine + 25 mM NaHCO <sub>3</sub> | KCLB     | 71588    |
| 14 | SK-MES-1  | Lung squamous cell carcinoma  | 90% Dulbecco's MEM + 10% h.i. FBS                                                         | DSMZ     | ACC-353  |
| 15 | ML-1      | Acute myeloid leukemia        | 90% MEM (with Earle's salts) + 10% h.i. FBS + 2 mM L-glutamine + 1 mM sodium pyruvate     | DSMZ     | ACC-464  |
| 16 | Calu-3    | Lung adenocarcinoma           | 90% MEM (with Earle's salts) + 10% h.i. FBS                                               | DSMZ     | ACC-734  |
| 17 | HeLa      | Cervical adenocarcinoma       | 90% Dulbecco's MEM + 10% h.i. FBS                                                         | KCLB     | 10002    |

69 Abbreviations: h.i. FBS, heat inactivated fetal bovine serum; DSMZ, Deutsche Sammlung von  
70 Mikroorganismen und Zellkulturen; ATCC, American Type Culture Collection; SNU, Seoul  
71 National University Hospital; KCLB, Korean Cell Line Bank.

72 **Supplementary Table 5. Information on the siRNA sequences**

| Target                                           | Sense (5' – 3')                             | Antisense (5' – 3')                                |
|--------------------------------------------------|---------------------------------------------|----------------------------------------------------|
| siAIMP2                                          | AGU CUA ACC UGU CUC UGC<br>AAG CUC U        | A GAG CUU GCA GAG ACA GGU<br>UAG ACU               |
| siAIMP2-DX2<br>(red = exon 1,<br>black = exon 3) | <b>CAC GUG CAG</b> GAU UAC GGG<br>GCG CUG A | U CAG CGC CCC GUA AUC <b>CUG</b><br><b>CAC GUG</b> |
| siLuc                                            | CUU ACG CUG AGU ACU UCG A                   | UCG AAG UAC UCA GCG UAA G                          |

73
